# Supplementary material for: Facile C–H bond activation on a transient gallium imide
Source: Royal Society of Chemistry journal article supplement (doi:10.1039/d2cc01857h), 2022-01-01
Supplement: d2cc01857h1.pdf [file d2cc01857h1.pdf]

## Supporting Information

to the paper

### Facile C–H Bond Activation on a Transient Gallium Imide

by

Aishabibi Kassymbek,<sup>†</sup> Denis Spasyuk,<sup>‡</sup> Anton Dmitrienko,<sup>†</sup> Melanie Pilkington,<sup>†</sup> and Georgii I.

Nikonov<sup>†</sup>

<sup>†</sup> Department of Chemistry, Brock University, 1812 Sir Isaac Brock Way, St. Catharines, Ontario, Canada L2S 3A1. E-mail: gnikonov@brocku.ca

<sup>‡</sup> SM and MX Crystallography, Canadian Light Source Inc., 44 Innovation Blvd., Saskatoon, Saskatchewan S7N 2V3, Canada

## Table of Content

**Synthetic Methods**.....SI2

**X-ray crystallography**.....SI14

**References**.....SI17

## Synthetic methods

**General:** All manipulations were performed using standard inert atmosphere ( $N_2$  gas) glovebox and Schlenk techniques. Toluene was dried using a Grubbs-type solvent purification system.  $d_6$ -Benzene was pre-dried and distilled from K/Na alloy and stored in a glass vessel in the glovebox. NMR spectra were obtained with a Bruker AVANCE III HD 400 and 600 MHz spectrometers ( $^1H$ , 400 and 600 MHz;  $^{13}C$ , 101 and 151 MHz) at room temperature, unless stated otherwise, then processed and analyzed with MestReNova software (v10.0.2-15465). Elemental analyses were obtained by the analytical laboratories of University of Toronto. All reagents were purchased from Sigma Aldrich or Alfa Aesar and used as received. Compound NacNacGa was prepared according to a literature procedure.<sup>1</sup>

### Preparation of NacNacGa(py)(NHSiMe<sub>3</sub>) (**2**)

To a solution of NacNacGa (0.063 g, 0.13 mmol) in toluene was added pyridine (0.010 mL, 0.13 mmol) and the mixture was treated with  $N_3SiMe_3$  (0.015 mL, 0.13 mmol). The reaction was allowed to stir for 10 min at room temperature. The volatiles were removed and NacNacGa(py)(NHSiMe<sub>3</sub>) was obtained in quantitative yield. Colorless crystals of **2** were obtained from a toluene solution at  $-30^\circ C$ .

**$^1H$  NMR** (400 MHz,  $C_6D_6$ )  $\delta$  8.65 (m, 1H  $C_5H_4N$ ), 7.92 (d, 1H,  $C_5H_4N$ ), 7.11 (m, 4H,  $C_6H_3$ ), 7.08 (m, 1H,  $C_5H_4N$ ) 7.02 (m, 2H,  $C_6H_3$ ), 6.69 (m, 1H,  $C_5H_4N$ ), 4.85 (s, 1H, CH), 3.59 (hept, 2H,  $CH(CH_3)_2$   $^3J_{H-H} = 6.8$  Hz), 3.05 (hept, 2H,  $CH(CH_3)_2$   $^3J_{H-H} = 6.7$  Hz), 1.62 (s, 6H,  $NCCH_3$ ), 1.50 (d, 6H,  $CH(CH_3)_2$ ,  $^3J_{H-H} = 6.8$  Hz), 1.16 (d, 6H,  $CH(CH_3)_2$ ,  $^3J_{H-H} = 6.8$  Hz), 1.05 (d, 6H,  $CH(CH_3)_2$ ,  $^3J_{H-H} = 6.7$  Hz), 0.52 (d, 6H,  $CH(CH_3)_2$ ,  $^3J_{H-H} = 6.7$  Hz), 0.04 (s, 9H,  $Si(CH_3)_3$ ), -0.58 (s, 1H, NH).

**$^{13}C\{^1H\}$  NMR** (101 MHz,  $C_6D_6$ )  $\delta$  169.36 ( $NCCH_3$ ), 145.0, 143.6, 141.6, 127.1, 124.72, 124.01 ( $C_6H_3$ ), 179.5, 149.52, 132.9, 132.2, 121.81 ( $C_5H_4N$ ), 96.6 (CH), 29.0, 28.1 ( $CH(CH_3)_2$ ), 25.0, 24.7, 24.5, 24.4 ( $CH(CH_3)_2$ ), 23.9 ( $NCCH_3$ ), 3.6 ( $Si(CH_3)_3$ ).

**Elemental analysis:** Calculated for  $C_{37}H_{55}GaN_4Si \cdot Toluene$ : C, 70.86; H, 8.51; N, 7.51. Found: C, 70.57; H, 9.04; N, 7.07.

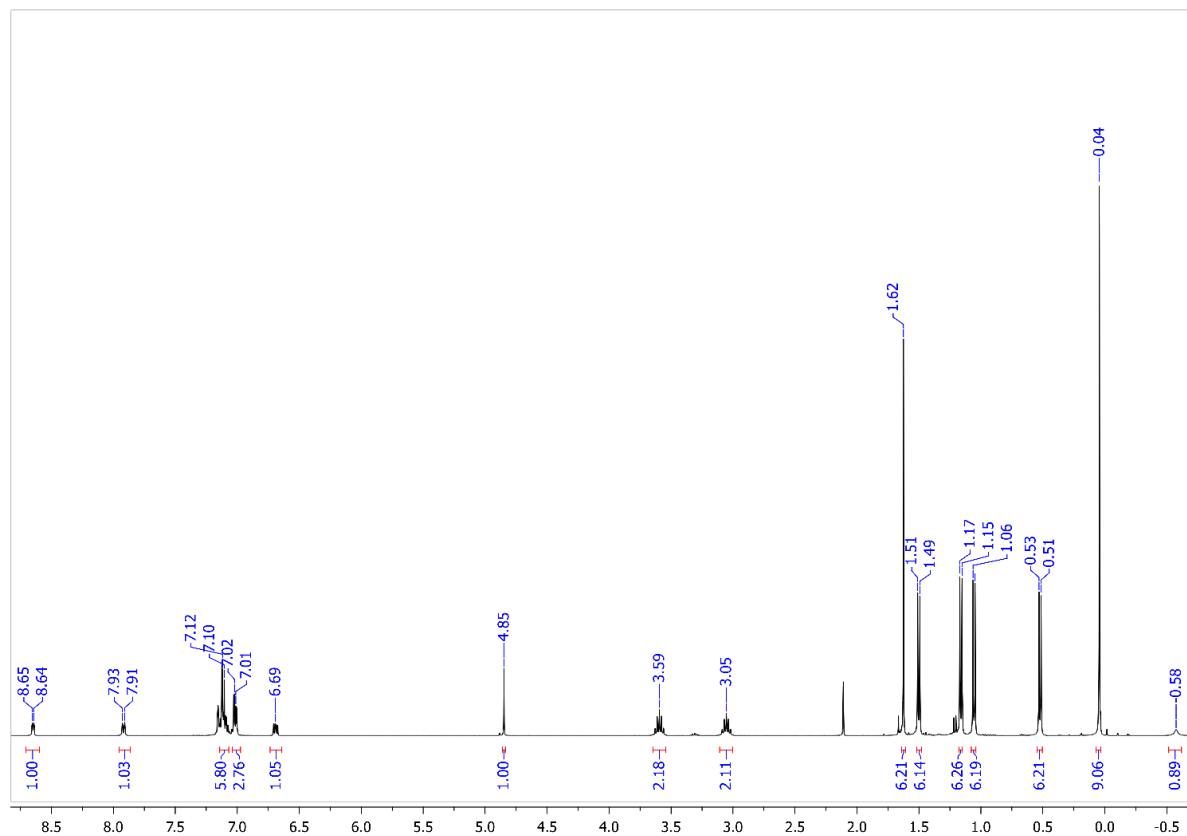

**Figure S1.** <sup>1</sup>H NMR (400 MHz, C<sub>6</sub>D<sub>6</sub>) spectrum of NacNacGa(py)(NHSiMe<sub>3</sub>).

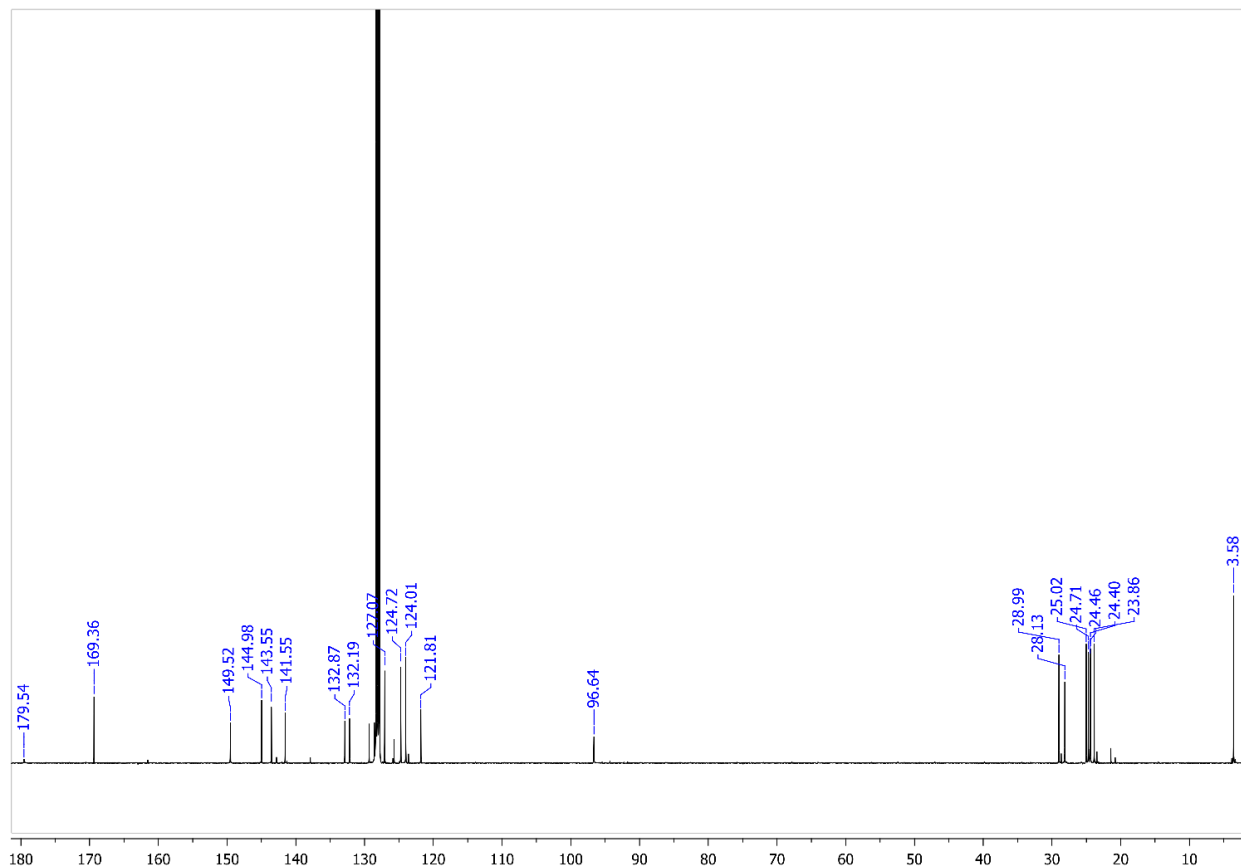

**Figure S2.**  $^{13}\text{C}\{^1\text{H}\}$  NMR (101 MHz,  $\text{C}_6\text{D}_6$ ) spectrum of  $\text{NacNacGa}(\text{py})(\text{NHSiMe}_3)$ .

### Preparation of $\text{NacNacGa}(\text{OC}(\text{=CH}(\text{CH}_2)_4-)(\text{NHSiMe}_3)$ (**3**)

To a solution of  $\text{NacNacGa}$  (0.078 g, 0.16 mmol) in toluene was added cyclohexanone (0.017 mL, 0.16 mmol) and the mixture was treated with  $\text{N}_3\text{SiMe}_3$  (0.021 mL, 0.16 mmol). The reaction was allowed to stir for 10 min at room temperature. The volatiles were removed to give  $\text{NacNacGa}(\text{OC}(\text{=CH}(\text{CH}_2)_4-)(\text{NHSiMe}_3)$  as a white powder in quantitative yield. X-ray quality single crystals of **3** were obtained from a toluene solution at  $-30^\circ\text{C}$ .

**$^1\text{H}$  NMR** (400 MHz,  $\text{C}_6\text{D}_6$ )  $\delta$  7.17-7.01 (m, 6H,  $\text{C}_6\text{H}_3$ ), 4.87 (s, 1H, CH), 4.53 (m, 1H,  $\text{OC}_6\text{H}_9$ ), 3.56 (hept, 2H,  $\text{CH}(\text{CH}_3)_2$ ,  $^3J_{\text{H-H}} = 6.8$  Hz), 3.18 (hept, 2H,  $\text{CH}(\text{CH}_3)_2$ ,  $^3J_{\text{H-H}} = 6.9$  Hz), 2.32 (m, 4H,  $\text{OC}_6\text{H}_9$ ), 1.81 (m, 2H,  $\text{OC}_6\text{H}_9$ ), 1.71 (m, 2H,  $\text{OC}_6\text{H}_9$ ), 1.49 (s, 6H,  $\text{NCCH}_3$ ), 1.44 (d, 6H,  $\text{CH}(\text{CH}_3)_2$ ,  $^3J_{\text{H-H}} = 6.8$  Hz), 1.37 (d, 6H,  $\text{CH}(\text{CH}_3)_2$ ,  $^3J_{\text{H-H}} = 6.9$  Hz), 1.25 (d, 6H,  $\text{CH}(\text{CH}_3)_2$ ,  $^3J_{\text{H-H}} = 6.8$  Hz), 1.08 (d, 6H,  $\text{CH}(\text{CH}_3)_2$ ,  $^3J_{\text{H-H}} = 6.9$  Hz), -0.10 (s, 9H,  $\text{Si}(\text{CH}_3)_3$ ), -0.89 (s, 1H, NH).

**$^{13}\text{C}\{^1\text{H}\}$  NMR** (101 MHz,  $\text{C}_6\text{D}_6$ )  $\delta$  169.7 ( $\text{NCCH}_3$ ), 155.5 ( $\text{OC}(=\text{CH})(\text{CH}_2)_4$ ), 145.6, 143.3, 140.8, 127.6, 124.9, 123.9, 96.7 ( $\text{CH}$ ), 96.3 ( $\text{OC}(=\text{CH})(\text{CH}_2)_4$ ), 28.95, 28.35 ( $\text{CH}(\text{CH}_3)_2$ ), 31.6, 25.63, 24.8, 24.1 ( $\text{CH}_2$ ), 25.6, 24.9, 24.8, 24.6 ( $\text{CH}(\text{CH}_3)_2$ ), 23.7 ( $\text{NCCH}_3$ ), 2.9 ( $\text{Si}(\text{CH}_3)_3$ ).

Elemental analysis: Calculated for  $\text{C}_{38}\text{H}_{60}\text{GaN}_3\text{OSi} \cdot 0.5\text{Tol}$ : C 69.35; H, 8.97; N, 5.85. Found: C 69.16, H 9.09, N 5.62.

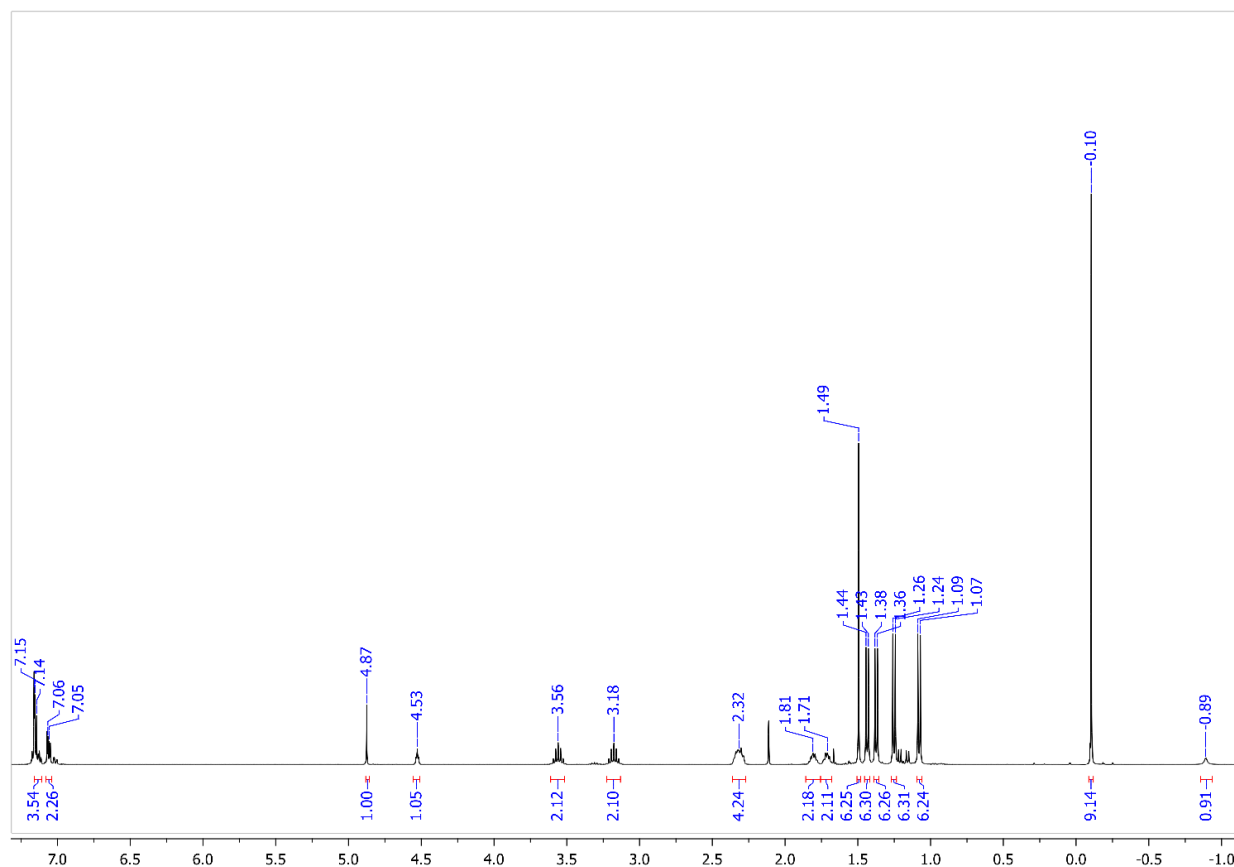

**Figure S3.**  $^1\text{H}$  NMR (400 MHz,  $\text{C}_6\text{D}_6$ ) spectrum of  $\text{NacNacGa}(\text{OC}(=\text{CH}(\text{CH}_2)_4-(\text{NHSiMe}_3))$ .

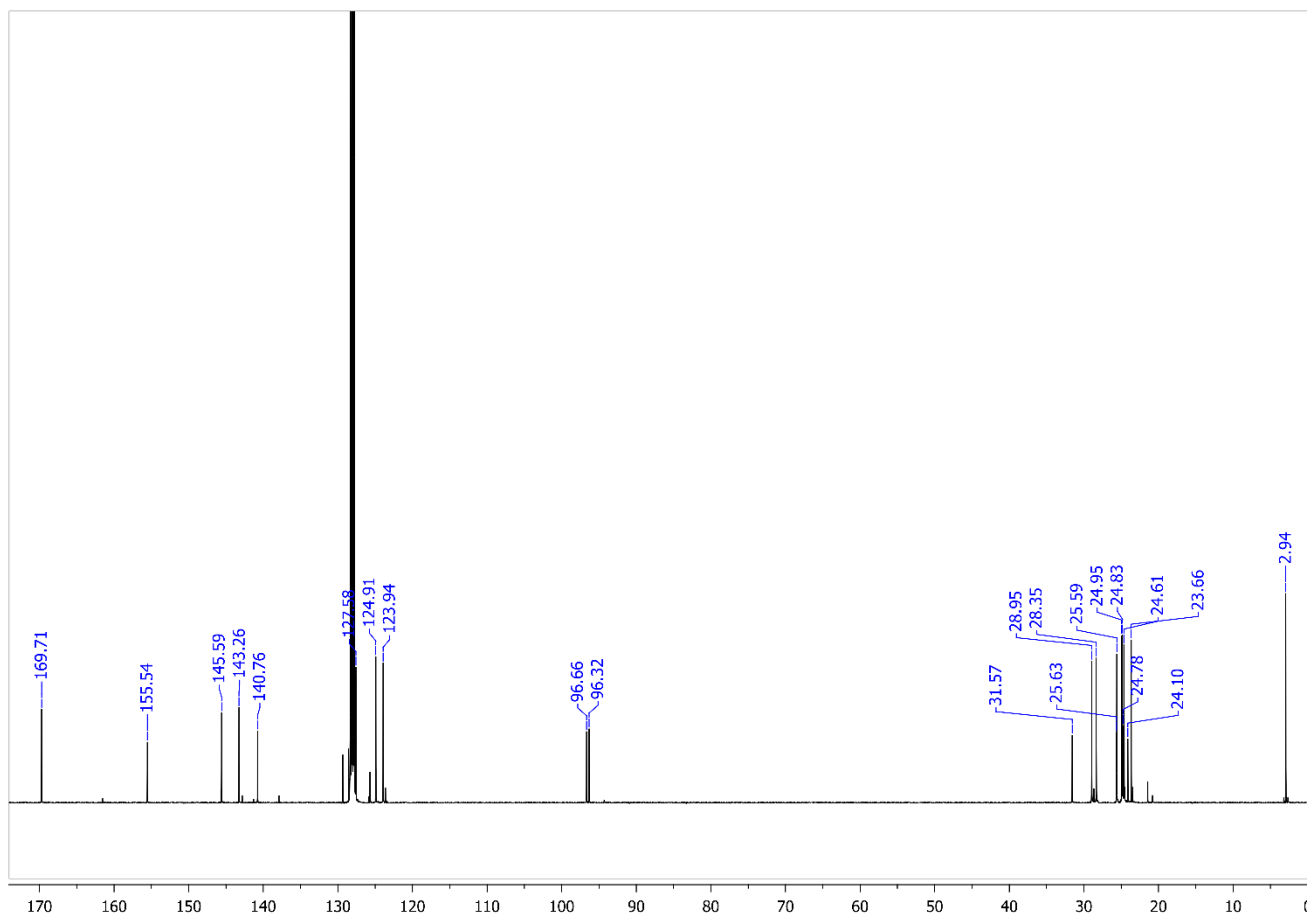

**Figure S4.**  $^{13}\text{C}\{^1\text{H}\}$  NMR (101 MHz,  $\text{C}_6\text{D}_6$ ) spectrum of  $\text{NacNacGa}(\text{OC}(=\text{CH}(\text{CH}_2)_4-)(\text{NHSiMe}_3)$ .

#### Preparation of $\text{NacNacGa}(\text{CH}_2\text{CO}_2\text{CH}_2\text{CH}_3)(\text{NHSiMe}_3)$ (**4**)

To a solution of  $\text{NacNacGa}$  (0.078 g, 0.16 mmol) in toluene was added ethyl acetate (0.016 mL, 0.16 mmol) and the mixture was treated with  $\text{N}_3\text{SiMe}_3$  (0.021 mL, 0.16 mmol). The reaction was allowed to stir for 10 min at room temperature. The volatiles were removed to give  $\text{NacNacGa}(\text{CH}_2\text{CO}_2\text{CH}_2\text{CH}_3)(\text{NHSiMe}_3)$  as a white powder in quantitative yield. Analytically pure material was upon obtained by crystallization from ether. X-ray quality single crystals of **4** were obtained from toluene at  $-30^\circ\text{C}$ .

**$^1\text{H}$  NMR** (400 MHz,  $\text{C}_6\text{D}_6$ )  $\delta$  7.19-7.08 (m, 6H,  $\text{C}_6\text{H}_3$ ), 4.72 (s, 1H, CH), 4.01 (q, 2H,  $\text{OCH}_2\text{CH}_3$ ,  $^3J_{\text{H-H}} = 7.14$  Hz), 3.96 (hept, 2H,  $\text{CH}(\text{CH}_3)_2$ ,  $^3J_{\text{H-H}} = 6.7$  Hz), 3.45 (hept, 2H,  $\text{CH}(\text{CH}_3)_2$ ,  $^3J_{\text{H-H}} = 6.8$  Hz), 1.90 (s, 2H,  $\text{CH}_2$ ), 1.56 (s, 6H,  $\text{NCCH}_3$ ), 1.47 (d, 6H,  $\text{CH}(\text{CH}_3)_2$ ,  $^3J_{\text{H-H}} = 6.7$  Hz), 1.37 (d, 6H,  $\text{CH}(\text{CH}_3)_2$ ,  $^3J_{\text{H-H}} = 6.8$  Hz), 1.33 (d, 6H,  $\text{CH}(\text{CH}_3)_2$ ,  $^3J_{\text{H-H}} = 6.7$  Hz), 1.12 (d, 6H,  $\text{CH}(\text{CH}_3)_2$ ,  $^3J_{\text{H-H}} = 6.8$  Hz), 1.07 (t, 3H,  $\text{OCH}_2\text{CH}_3$ ,  $^3J_{\text{H-H}} = 7.14$  Hz), -0.20 (s, 9H,  $\text{Si}(\text{CH}_3)_3$ ), -0.59 (s, 1H, NH).

$^{13}\text{C}\{^1\text{H}\}$  NMR (101 MHz,  $\text{C}_6\text{D}_6$ )  $\delta$  175.2 (CO), 170.2 (NCCH<sub>3</sub>), 145.7, 144.0, 141.1, 127.3, 125.2, 124.3 (C<sub>6</sub>H<sub>3</sub>), 97.6 (CH), 59.4 (OCH<sub>2</sub>CH<sub>3</sub>), 28.7, 26.9 (CH(CH<sub>3</sub>)<sub>2</sub>), 26.1, 25.12, 25.06, 24.9 (CH(CH<sub>3</sub>)<sub>2</sub>), 23.9 (NCCH<sub>3</sub>), 20.9 (CH<sub>2</sub>), 14.8 (OCH<sub>2</sub>CH<sub>3</sub>), 3.2 (Si(CH<sub>3</sub>)<sub>3</sub>).

Elemental analysis: Calculated for C<sub>36</sub>H<sub>58</sub>GaN<sub>3</sub>O<sub>2</sub>Si: C, 65.25; H, 8.82; N, 6.34. Found: C, 65.45; H, 9.65, N, 6.37.

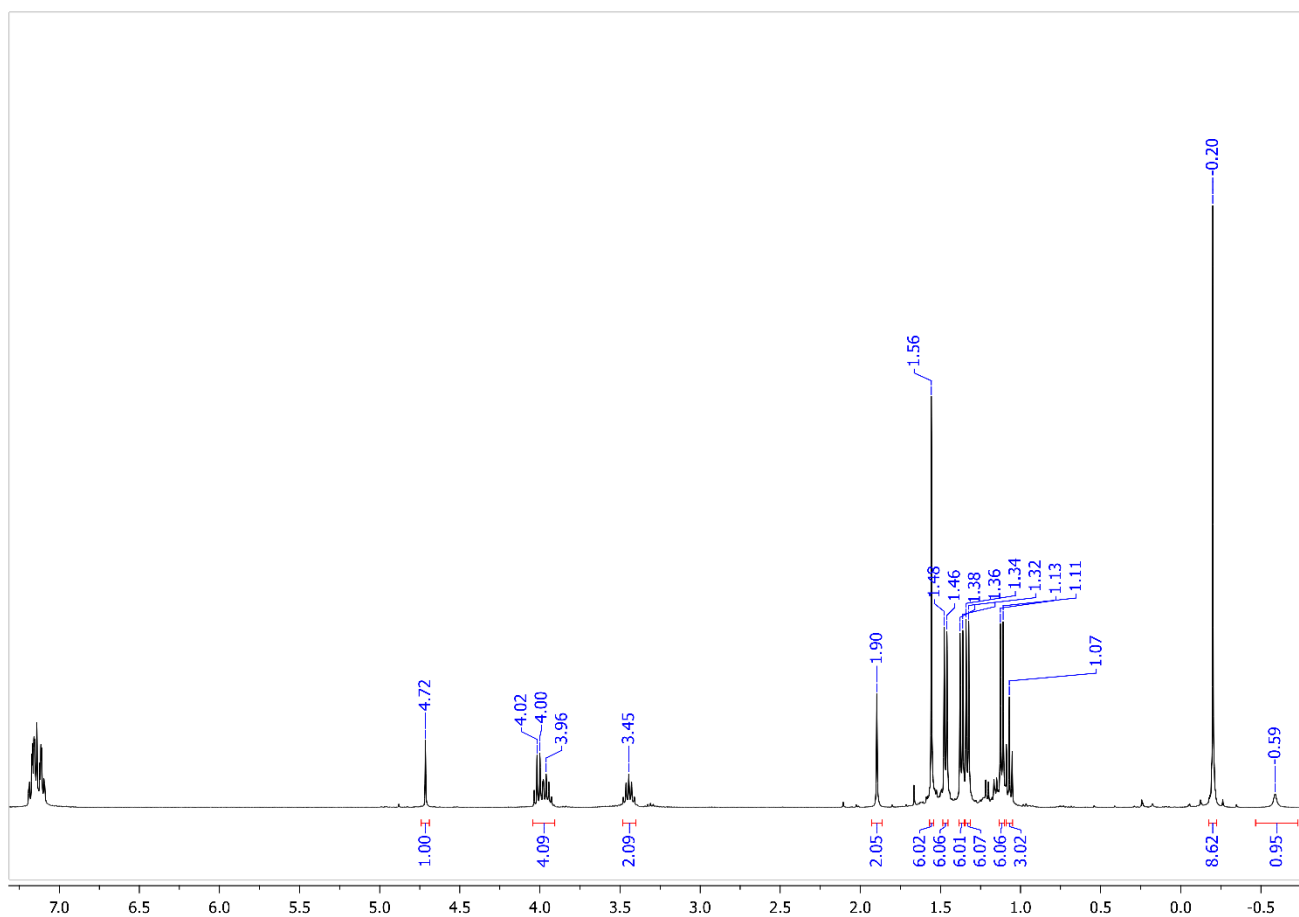

**Figure S5.**  $^1\text{H}$  NMR (400 MHz,  $\text{C}_6\text{D}_6$ ) spectrum of NacNacGa(CH<sub>2</sub>CO<sub>2</sub>CH<sub>2</sub>CH<sub>3</sub>)(NHSiMe<sub>3</sub>).

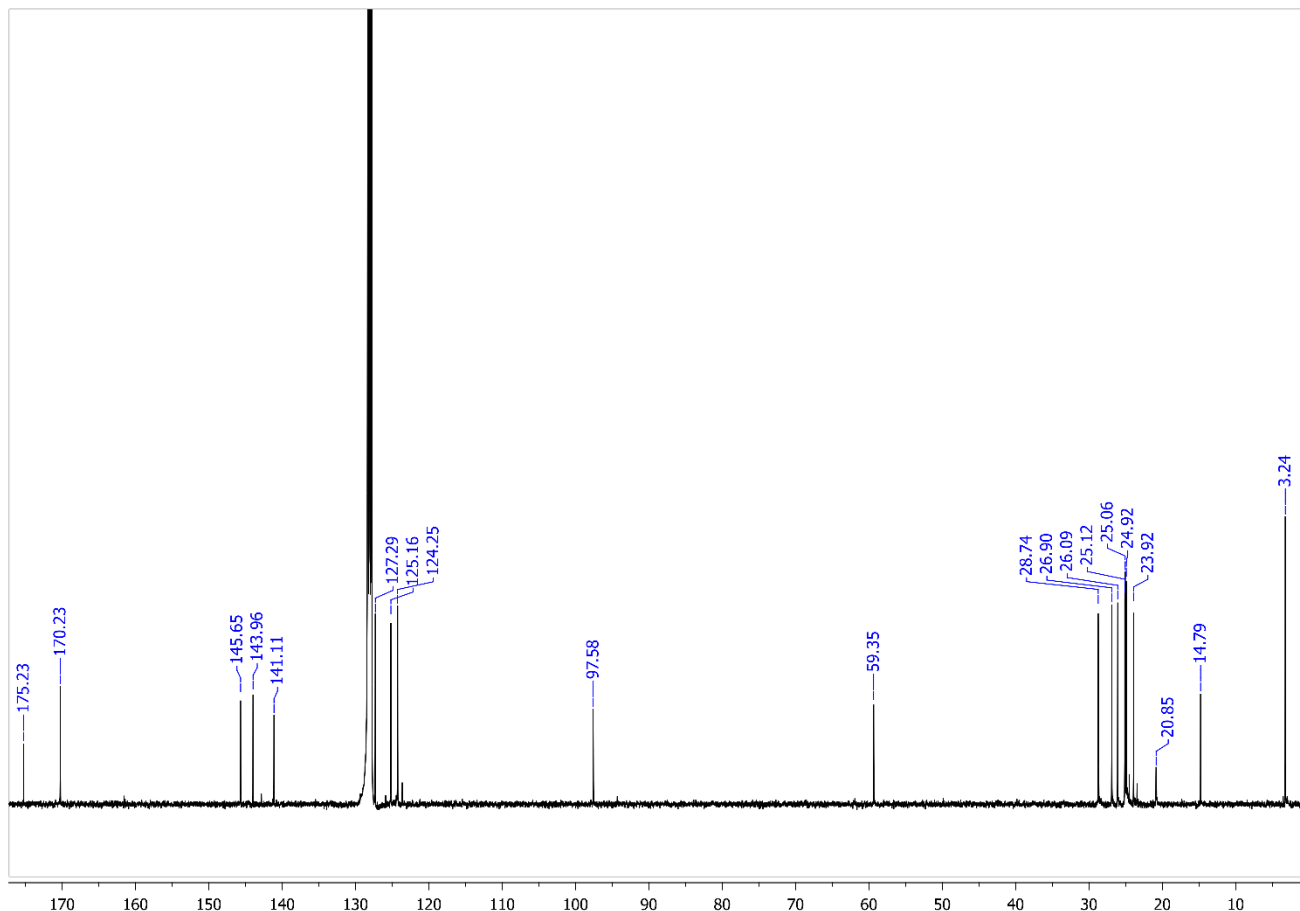

**Figure S6.**  $^{13}\text{C}\{^1\text{H}\}$  NMR (101 MHz,  $\text{C}_6\text{D}_6$ ) spectrum of  $\text{NacNacGa}(\text{CH}_2\text{CO}_2\text{CH}_2\text{CH}_3)(\text{NHSiMe}_3)$ .

### Preparation of $\text{NacNacGa}(\text{OS}(\text{CH}_2)(\text{CH}_3))(\text{NHSiMe}_3)$ (**5**)

To a solution of  $\text{NacNacGa}$  (0.071 g, 0.15 mmol) in toluene was added DMSO (0.010 mL, 0.15 mmol) and the mixture was treated with  $\text{N}_3\text{SiMe}_3$  (0.019 mL, 0.15 mmol). The reaction was allowed to stir for 10 min at room temperature. The volatiles were removed and  $\text{NacNacGa}(\text{OS}(\text{CH}_2)(\text{CH}_3))(\text{NHSiMe}_3)$  was obtained as a white powder in quantitative yield.

**$^1\text{H}$  NMR** (400 MHz,  $\text{C}_6\text{D}_6$ )  $\delta$  7.19-7.05 (m, 6H,  $\text{C}_6\text{H}_3$ ), 4.91 (s, 1H, CH), 4.10 (hept, 1H,  $\text{CH}(\text{CH}_3)_2$ ,  $^3J_{\text{H-H}} = 6.8$  Hz), 3.55 (m, 2H,  $\text{CH}(\text{CH}_3)_2$ ), 3.39 (hept, 1H,  $\text{CH}(\text{CH}_3)_2$ ,  $^3J_{\text{H-H}} = 6.8$  Hz), 2.28 (d, 1H,  $\text{SCH}_2$ ,  $^2J_{\text{H-H}} = 12.8$  Hz), 2.12 (s, 3H,  $\text{SCH}_3$ ), 1.81 (d, 1H,  $\text{SCH}_2$ ,  $^2J_{\text{H-H}} = 12.8$  Hz), 1.62 (s, 3H,  $\text{NCCH}_3$ ), 1.54 (s, 3H,  $\text{NCCH}_3$ ), 1.44 (d, 3H,  $\text{CH}(\text{CH}_3)_2$ ,  $^3J_{\text{H-H}} = 6.9$  Hz), 1.42 (d, 6H,  $\text{CH}(\text{CH}_3)_2$ ,  $^3J_{\text{H-H}} = 6.8$  Hz), 1.36 (d, 6H,  $\text{CH}(\text{CH}_3)_2$ ,  $^3J_{\text{H-H}} = 6.8$  Hz), 1.18 (d, 6H,  $\text{CH}(\text{CH}_3)_2$ ,  $^3J_{\text{H-H}} = 6.8$  Hz), 1.13 (d, 3H,  $\text{CH}(\text{CH}_3)_2$ ,  $^3J_{\text{H-H}} = 6.9$  Hz), 1.12 (d, 3H,  $\text{CH}(\text{CH}_3)_2$ ,  $^3J_{\text{H-H}} = 6.9$  Hz), -0.13 (s, 9H,  $\text{Si}(\text{CH}_3)_3$ ), -0.27 (s, 1H, NH).



**$^{13}\text{C}\{^1\text{H}\}$  NMR** (101 MHz,  $\text{C}_6\text{D}_6$ )  $\delta$  170.8, 168.6 ( $\text{NCCH}_3$ ), 145.3, 144.2, 144.0, 143.8, 140.9, 140.8, 126.94, 126.87, 124.7, 124.3, 123.9 ( $\text{C}_6\text{H}_3$ ), 98.2 ( $\text{CH}$ ), 45.3 ( $\text{SCH}_3$ ), 41.1 ( $\text{SCH}_2$ ), 28.4, 28.3, 27.1, 26.5 ( $\text{CH}(\text{CH}_3)_2$ ), 26.0, 25.3, 24.8, 24.7, 24.6, 24.4, 23.9, 23.4 ( $\text{NCCH}_3$ ), 3.1 ( $\text{Si}(\text{CH}_3)_3$ ).

**Elemental analysis:** Calculated for  $\text{C}_{34}\text{H}_{56}\text{Ga}\text{N}_3\text{OSSi}$ : C, 62.57; H, 8.65; N, 6.44. Found: C, 62.51; H, 8.75; N, 6.10.

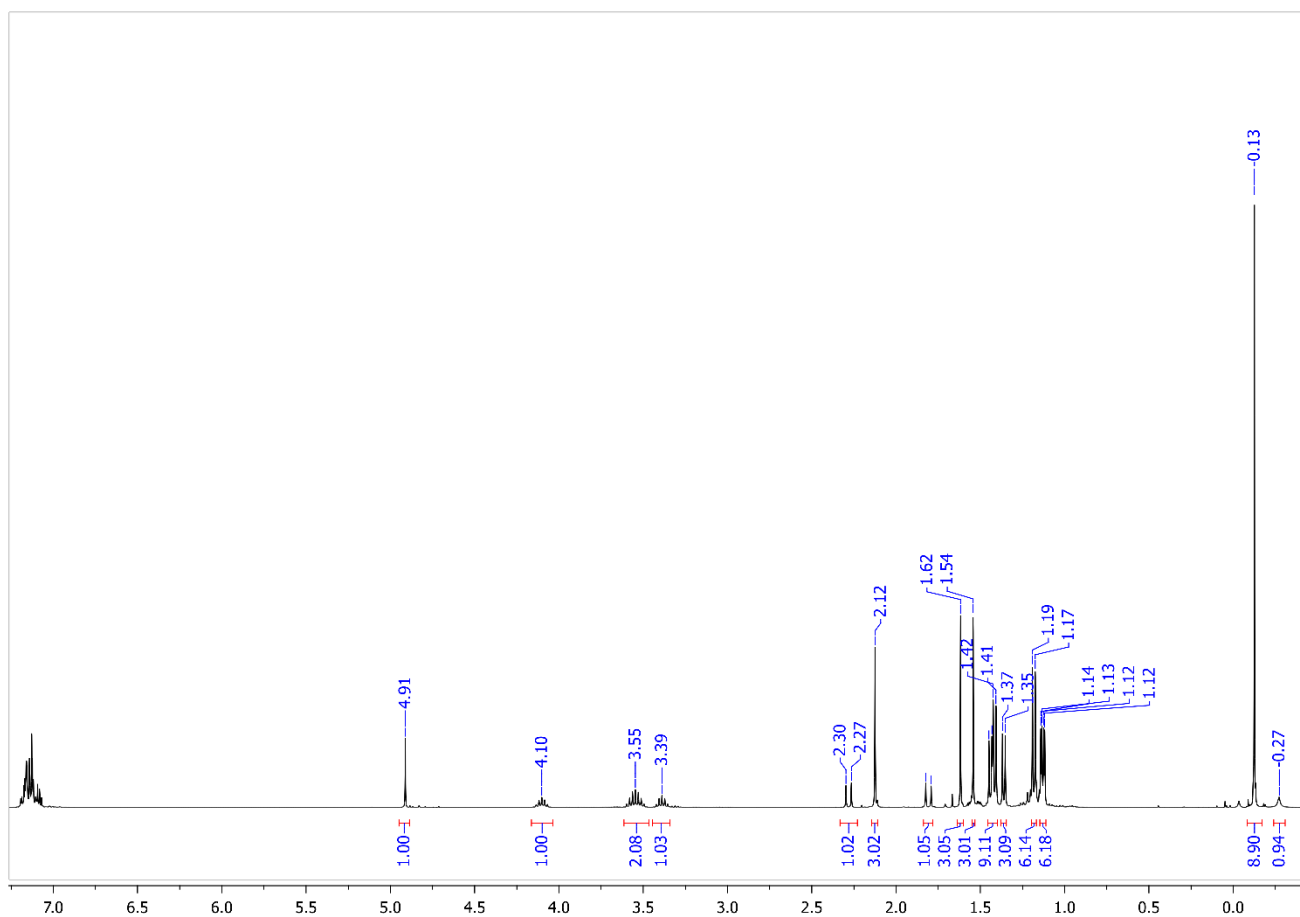

**Figure S7.**  $^1\text{H}$  NMR (400 MHz,  $\text{C}_6\text{D}_6$ ) spectrum of  $\text{NacNacGa}(\text{OS}(\text{CH}_2)(\text{CH}_3))(\text{NHSiMe}_3)$ .

### Preparation of $\text{NacNacGa}(\text{OP}(\text{CHCH}_3)(\text{CH}_2\text{CH}_3)_2)(\text{NHSiMe}_3)$ (6)

**<sup>1</sup>H {<sup>31</sup>P} NMR** (400 MHz, C6D6) δ 7.21-7.03 (m, 6H, C<sub>6</sub>H<sub>3</sub>), 4.94 (s, 1H, CH), 4.03 (hept, 1H, CH(CH<sub>3</sub>)<sub>2</sub> <sup>3</sup>J<sub>H-H</sub> = 6.7 Hz), 3.96 (hept, 1H, CH(CH<sub>3</sub>)<sub>2</sub> <sup>3</sup>J<sub>H-H</sub> = 6.7 Hz), 3.29 (hept, 1H, CH(CH<sub>3</sub>)<sub>2</sub> <sup>3</sup>J<sub>H-H</sub> = 6.7 Hz), 3.24 (hept, 1H, CH(CH<sub>3</sub>)<sub>2</sub> <sup>3</sup>J<sub>H-H</sub> = 6.7 Hz), 2.20 (s, 1H, NH), 1.65 (s, 3H, NCCH<sub>3</sub>), 1.64 (d, 3H, CH(CH<sub>3</sub>)<sub>2</sub>, <sup>3</sup>J<sub>H-H</sub> = 6.7 Hz), 1.62 (s, 3H, NCCH<sub>3</sub>), 1.61 (d, 3H, CH(CH<sub>3</sub>)<sub>2</sub>, <sup>3</sup>J<sub>H-H</sub> = 6.7 Hz), 1.28 (m, 12H, CH(CH<sub>3</sub>)<sub>2</sub>), 1.12 (d, 3H, CH(CH<sub>3</sub>)<sub>2</sub>, <sup>3</sup>J<sub>H-H</sub> = 6.7 Hz), 1.07 (d, 3H, CH(CH<sub>3</sub>)<sub>2</sub>, <sup>3</sup>J<sub>H-H</sub> = 6.7 Hz), 1.03 (m, 1H, PCH<sub>2</sub>CH<sub>3</sub>), 1.01 (q, 1H, PCHCH<sub>3</sub>, <sup>3</sup>J<sub>H-H</sub> = 7.6 Hz), 0.86 (m, 1H, PCH<sub>2</sub>CH<sub>3</sub>), 0.78 (t, 3H,

$\text{PCH}_2\text{CH}_3$ ,  $^3J_{\text{H-H}} = 7.2$  Hz), 0.75 (t, 3H,  $\text{PCH}_2\text{CH}_3$ ,  $^3J_{\text{H-H}} = 7.3$  Hz), 0.69 (m, 1H,  $\text{PCH}_2\text{CH}_3$ ), 0.56 (m, 1H,  $\text{PCH}_2\text{CH}_3$ ), 0.51 (d, 3H,  $\text{PCHCH}_3$ ,  $^3J_{\text{H-H}} = 7.6$  Hz), 0.40 (s, 9H,  $\text{Si}(\text{CH}_3)_3$ ).

$^{13}\text{C}\{^1\text{H}\}$  NMR (101 MHz,  $\text{C}_6\text{D}_6$ )  $\delta$  169.6, 169.4 ( $\text{NCCH}_3$ ), 146.4, 146.2, 143.3, 143.2, 143.0, 142.1, 127.04, 127.01, 125.9, 125.7, 124.2, 124.0 ( $\text{C}_6\text{H}_3$ ), 98.7 (CH), 28.9, 28.7, 27.8, 27.7 ( $\text{CH}(\text{CH}_3)_2$ ), 26.4, 25.9, 25.8, 25.31, 25.29, 25.0, 24.9, 24.4 ( $\text{CH}(\text{CH}_3)_2$ ), 24.33, 24.29 ( $\text{NCCH}_3$ ), 18.4 ( $\text{PCH}_2\text{CH}_3$ ), 16.7 ( $\text{PCHCH}_3$ ), 19.7, 10.7 ( $\text{PCHCH}_3$ ), 19.1, 19.0, 5.8 ( $\text{PCH}_2\text{CH}_3$ ), 4.3 ( $\text{Si}(\text{CH}_3)_3$ ).

$^{31}\text{P}\{^1\text{H}\}$  NMR (162 MHz,  $\text{C}_6\text{D}_6$ )  $\delta$  52.86 ppm.

**Elemental analysis:** Calculated for  $\text{C}_{38}\text{H}_{65}\text{Ga}\text{N}_3\text{OPSi}$ : C, 64.40; H, 9.24, N, 5.93. Found: C, 64.87; H, 9.76; N, 5.97.

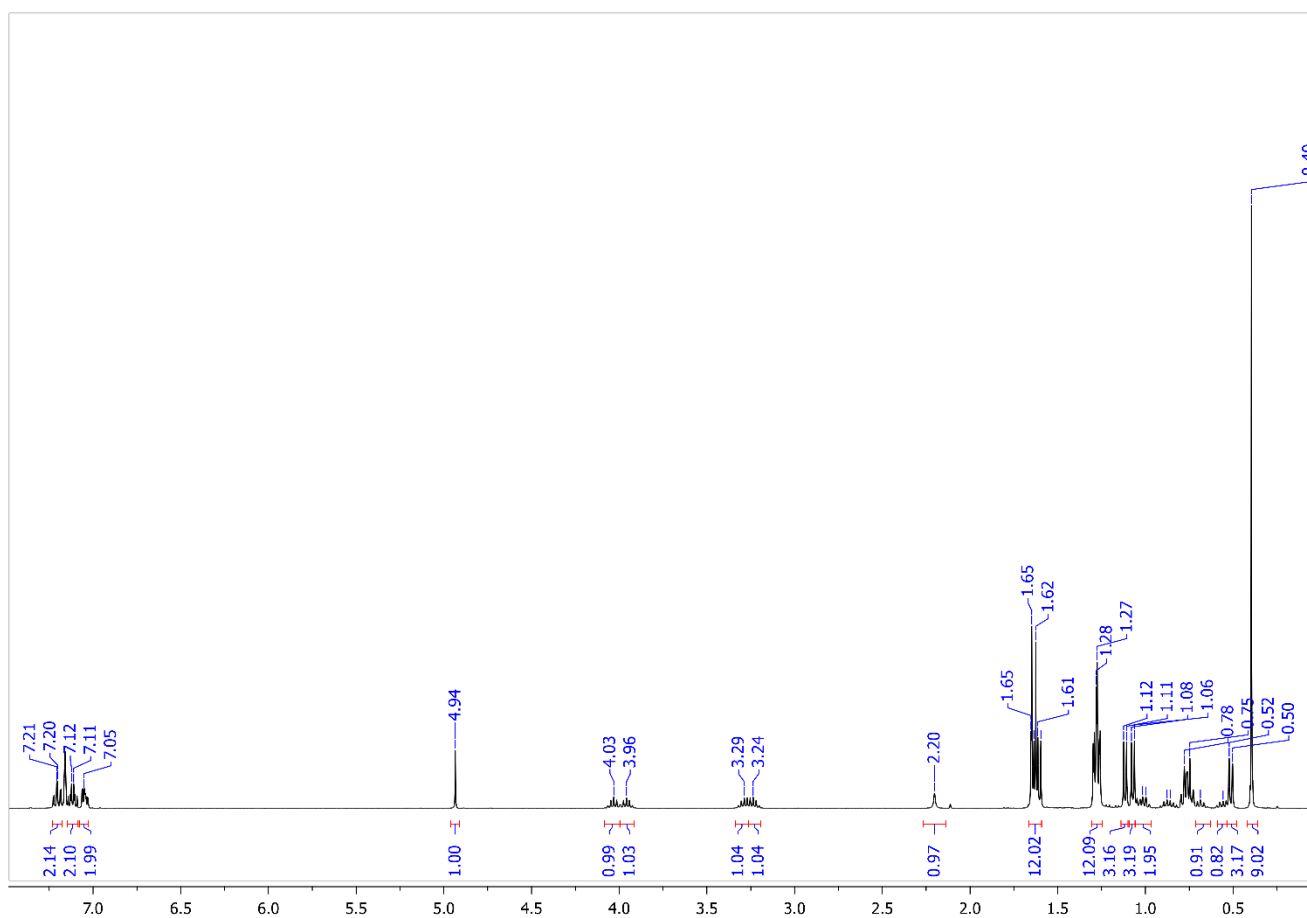

**Figure S9.**  $^1\text{H}\{^{31}\text{P}\}$  NMR (400 MHz,  $\text{C}_6\text{D}_6$ ) spectrum of  $\text{NacNacGa}(\text{OP}(\text{CHCH}_3)(\text{CH}_2\text{CH}_3)_2)(\text{NHSiMe}_3)$ .

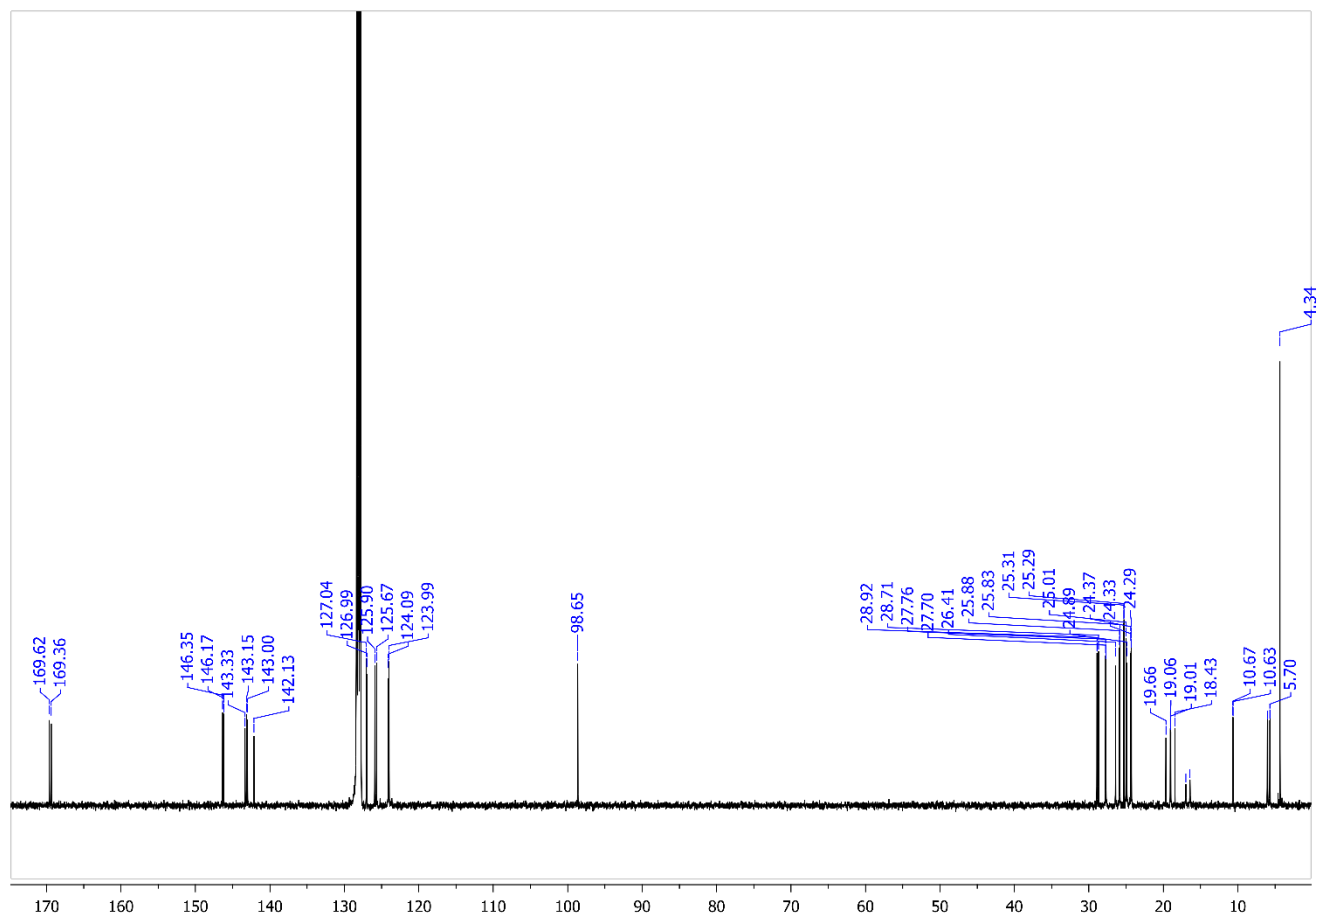

**Figure S10.** <sup>13</sup>C{<sup>1</sup>H} NMR (101 MHz, C<sub>6</sub>D<sub>6</sub>) spectrum of NacNacGa(OP(CHCH<sub>3</sub>)(CH<sub>2</sub>CH<sub>3</sub>)<sub>2</sub>)(NHSiMe<sub>3</sub>).

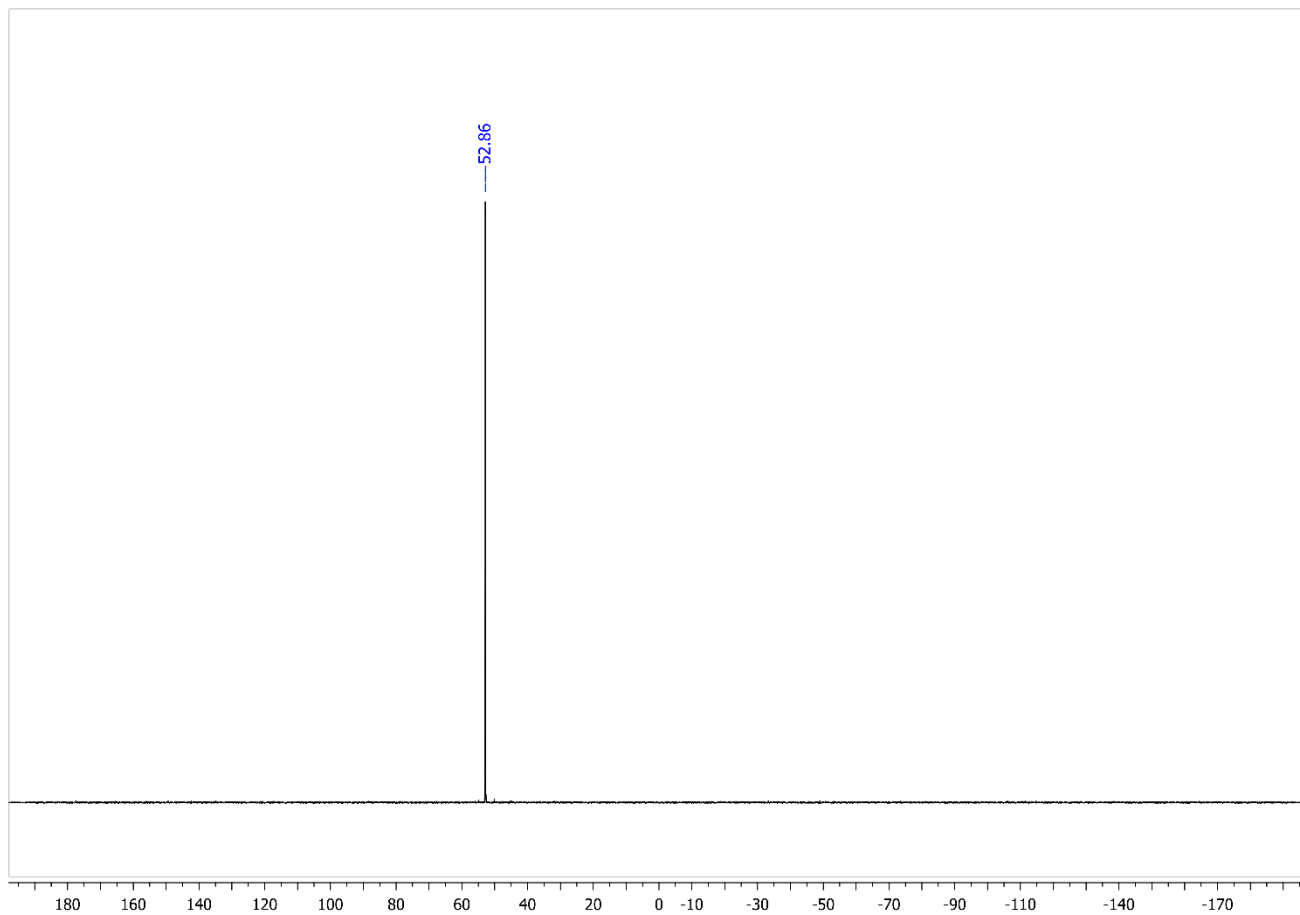

**Figure S11.**  $^{31}\text{P}\{^1\text{H}\}$  NMR (162 MHz,  $\text{C}_6\text{D}_6$ ) spectrum of  $\text{NacNacGa}(\text{OP}(\text{CHCH}_3)(\text{CH}_2\text{CH}_3)_2)(\text{NHSiMe}_3)$ .

## X-ray crystallography

Single crystals of **2**, **3**, **4**, and **6** were grown from diethyl ether at -30°C.

A suitable single crystal of compound **2** was mounted on a glass cryoloop covered with Paratone N<sup>®</sup> oil and examined on a Bruker APEX-II CCD diffractometer equipped with a CCD area detector and an Oxford Cryoflex low temperature device. Data were collected at 150(2) K with Mo K $\alpha$  radiation ( $\lambda = 0.71073$  Å) using the APEX-II software.<sup>2</sup> Generic  $\varphi$  and  $\omega$  scans were used for the data measurement. Unit cell determination, refinement and data-reduction were carried out with SAINT.<sup>3</sup> An absorption correction was performed with the multi-scan method implemented in SADABS.<sup>4</sup> The structures of the compounds were solved with SHELXT (Intrinsic phasing)<sup>5</sup> and refined using SHELXL-2014<sup>6</sup> in the Bruker SHELXTL suite.<sup>7</sup> Hydrogen atoms were added at calculated positions and refined using a riding model.

Single crystal X-ray diffraction data for compounds **3**, **4** and **6** were collected using the Canadian Macromolecular Crystallography Facility CMCF-BM beamline at the Canadian Light Source (CLS).<sup>8</sup> The CMCF-BM is a bending magnet beamline equipped with a Si (111) double crystal monochromator, Rayonix MX300HE CCD, and MD2 microdiffractometer equipped with Mini Kappa Goniometer Head. Data for compounds **3**, **4**, and **6** were collected at 19.0000 keV (0.6526 Å). Data for compounds **3**, **4**, and **6** were acquired at 100 K using Oxford Instruments Cryojet5.

Cell refinement and data reduction were performed using XDS.<sup>9</sup> A semi-empirical absorption correction, based on the multiple measurements of equivalent reflections, and merging of data was performed using SADABS.<sup>10</sup> Data conversion from XDS file format to SADABS file format was performed using XDS2SAD.<sup>11</sup> The space group was confirmed by XPREP routine.<sup>12</sup>

The structures of compounds **3**, **4**, and **6** were solved by direct-methods and refined by full-matrix least-squares and difference Fourier techniques with SHELXL-2018.<sup>13</sup> The real-space

refinement was performed using COOT<sup>14</sup>. The disorder in the alkyl groups were modeled as two-component disorders. All atoms of the disordered fragments were restrained using SADI restraints (bonds and angles) whenever possible. SIMU, DELU, and ISOR restraints were applied to the  $U_{ij}$  components whenever necessary.

All non-hydrogen atoms were refined with anisotropic displacement parameters. Hydrogen atoms were assigned in calculated positions and refined as riding atoms with a common thermal parameter, with the exception of the N-H hydrogens which were extracted from the difference Fourier maps and freely refined. All publication materials were prepared using LinXTL<sup>15</sup> and the Mercury<sup>16</sup> programs. The checkCIF routine and structure factor analyses were performed using PLATON.<sup>17</sup> Select experimental crystallographic data for all four compounds is presented in Table SI1.

**Table SI 1. Crystal data collection and refinement parameters for compounds 2- 4 and 6**

|                                                | <b>2</b>                                            | <b>3</b>                                                                                       | <b>4</b>                                                           | <b>6</b>                                              |
|------------------------------------------------|-----------------------------------------------------|------------------------------------------------------------------------------------------------|--------------------------------------------------------------------|-------------------------------------------------------|
| chemical formula                               | C <sub>37</sub> H <sub>55</sub> GaN <sub>4</sub> Si | C <sub>83</sub> H <sub>127</sub> Ga <sub>2</sub> N <sub>6</sub> O <sub>2</sub> Si <sub>2</sub> | C <sub>36</sub> H <sub>58</sub> GaN <sub>3</sub> O <sub>2</sub> Si | C <sub>38</sub> H <sub>65</sub> GaN <sub>3</sub> OPSi |
| crystal colour                                 | yellow                                              | colourless                                                                                     | colourless                                                         | colourless                                            |
| Fw; F(000)                                     | 930.41; 1943                                        | 1436.52; 1546                                                                                  | 662.66; 712                                                        | 708.71; 1528                                          |
| T (K)                                          | 100                                                 | 100                                                                                            | 100                                                                | 100                                                   |
| wavelength (Å)                                 | 0.68879                                             | 0.65254 (sync)                                                                                 | 0.65254 (sync)                                                     | 0.65254 (sync)                                        |
| space group                                    | P2 <sub>1</sub> /c                                  | P2 <sub>1</sub> /n                                                                             | P-1                                                                | P2 <sub>1</sub> /c                                    |
| a (Å)                                          | 8.2480(16)                                          | 11.940(2)                                                                                      | 9.468(2)                                                           | 12.943(3)                                             |
| b (Å)                                          | 37.082(7)                                           | 17.146(3)                                                                                      | 10.277(2)                                                          | 12.950(3)                                             |
| c (Å)                                          | 19.004(4)                                           | 20.083(4)                                                                                      | 20.409(4)                                                          | 23.406(5)                                             |
| α (deg)                                        | 90                                                  | 90                                                                                             | 89.67(3)                                                           | 90                                                    |
| β (deg)                                        | 94.33(3)                                            | 97.15(3)                                                                                       | 87.02(3)                                                           | 90.16(3)                                              |
| γ (deg)                                        | 90                                                  | 90                                                                                             | 64.19(3)                                                           | 90                                                    |
| Z                                              | 4                                                   | 2                                                                                              | 2                                                                  | 4                                                     |
| V (Å <sup>3</sup> )                            | 5796(2)                                             | 4079.5(14)                                                                                     | 1785.0(7)                                                          | 3923.1(14)                                            |
| ρ <sub>calcd</sub> (g·cm <sup>-3</sup> )       | 1.066                                               | 1.169                                                                                          | 1.233                                                              | 1.200                                                 |
| μ (mm <sup>-1</sup> )                          | 0.303                                               | 0.577                                                                                          | 0.656                                                              | 0.639                                                 |
| θ range (deg); completeness                    | 1.064 – 24.202;<br>0.953                            | 1.438 – 24.499;<br>1.000                                                                       | 0.917 – 24.499;<br>0.987                                           | 1.444 –<br>22.855; 1.000                              |
| collected reflections; R <sub>σ</sub>          | 19319; 0.0691                                       | 62238; 0.0369                                                                                  | 55320; 0.0354                                                      | 49408; 0.0486                                         |
| unique reflections; R <sub>int</sub>           | 9747; 0.0450                                        | 8774; 0.0632                                                                                   | 7554; 0.0628                                                       | 6944; 0.0753                                          |
| R1 <sup>a</sup> ; wR2 <sup>b</sup> [I > 2σ(I)] | 0.1196; 0.3150                                      | 0.0341; 0.0903                                                                                 | 0.0331; 0.0882                                                     | 0.0489; 0.1363                                        |
| R1; wR2 [all data]                             | 0.1938; 0.3962                                      | 0.0379; 0.0929                                                                                 | 0.0338; 0.0887                                                     | 0.0524; 0.1401                                        |
| GOF                                            | 1.141                                               | 1.076                                                                                          | 1.070                                                              | 1.103                                                 |
| largest diff peak and hole                     | 0.744 and -0.472                                    | 0.334 and -0.860                                                                               | 0.404 and -<br>0.748                                               | 0.725 and -<br>1.584                                  |



- 
- <sup>1</sup> Hardman, M. J.; Eichler, B. E.; Power, P. P. Synthesis and Characterization of the Monomer Ga{(NDippCMe)<sub>2</sub>CH} (Dipp = C<sub>6</sub>H<sub>3</sub>Pr<sup>i</sup><sub>2</sub>-2,6): a Low Valent Gallium(I) Carbene Analogue. *Chem. Commun.* **2000**, 1991–1992
  2. APEX Software Suite v.2010; Bruker AXS: Madison, WI, **2005**.
  3. SAINT. Data Reduction and Correction Program. v. 8.27B. Bruker AXS Inc., Madison, Wisconsin, USA, **2012**.
  4. Krause, L.; Herbst-Irmer, R.; Sheldrick, G. M.; Stalke, D. *J. Appl. Cryst.* **2015**, 3-10.
  5. G. M. Sheldrick, *Acta Cryst.*, **2015**, A71, 3-8.
  6. G. M. Sheldrick, *Acta Cryst.*, **2015**, A64, 112-122.
  7. Bruker, APEX2 (V2014.9), Bruker AXS Inc., Madison, Wisconsin, USA, 2014.
  8. Grochulski, P.; Fodje, M. N.; Gorin, J.; Labiuk, S. L.; Berg, R. *J. Synchrotron Rad.* **2011**, 18, 681–684.
  9. Kabsch, W. *J. Appl. Cryst.* **1993**, 26, 795-800.
  10. Krause, L., Herbst-Irmer, R., Sheldrick, G. M. & Stalke, D. *J. Appl. Cryst.* **2015**, 48, 3-10.
  11. XDS2SAD, Sheldrick, G. M. **2008**, University of Gottingen, Germany.
  12. a) XPREP, **2014**, Bruker AXS Inc., Madison, Wisconsin, USA. b) XPREP Version 2008, Sheldrick, G.M. **2008**, Bruker AXS Inc., Madison, Wisconsin, USA.
  13. (a) Sheldrick, G.M. SHELXS97, University of Gottingen, Germany **1997**. (b) Sheldrick, G. M. *Acta Cryst. A* **2008**, 64, 112–122. c) Sheldrick, G. M. *Acta Cryst. C* **2015**, 71, 3–8.
  14. Emsley, P., Lohkamp, B., Scott, W. G. & Cowtan, K. *Acta Cryst. A* **2010**, D66, 486–501.
  15. LinXTL, Spasyuk D. M. **2009**, University of Montreal, Canada. <http://sourceforge.net/projects/linxtl/>
  16. C. F. Macrae, I. J. Bruno, J. A. Chisholm, P. R. Edgington, P. McCabe, E. Pidcock, L. Rodriguez-Monge, R. Taylor, J. van de Streek and P. A. Wood, *J. Appl. Cryst.* **2008**, 41, 466-470
  17. A. L. Spek, *Acta Cryst.* **2009**, D65, 148-155.
